# Supplementary material for: Humans rather than climate the primary cause of Pleistocene megafaunal extinction in Australia
Source: PubMed Central journal article supplement (PMC5263868; doi:10.1038/ncomms14142), 2017-01-20
Supplement: ncomms14142-s1.pdf [file ncomms14142-s1.pdf]

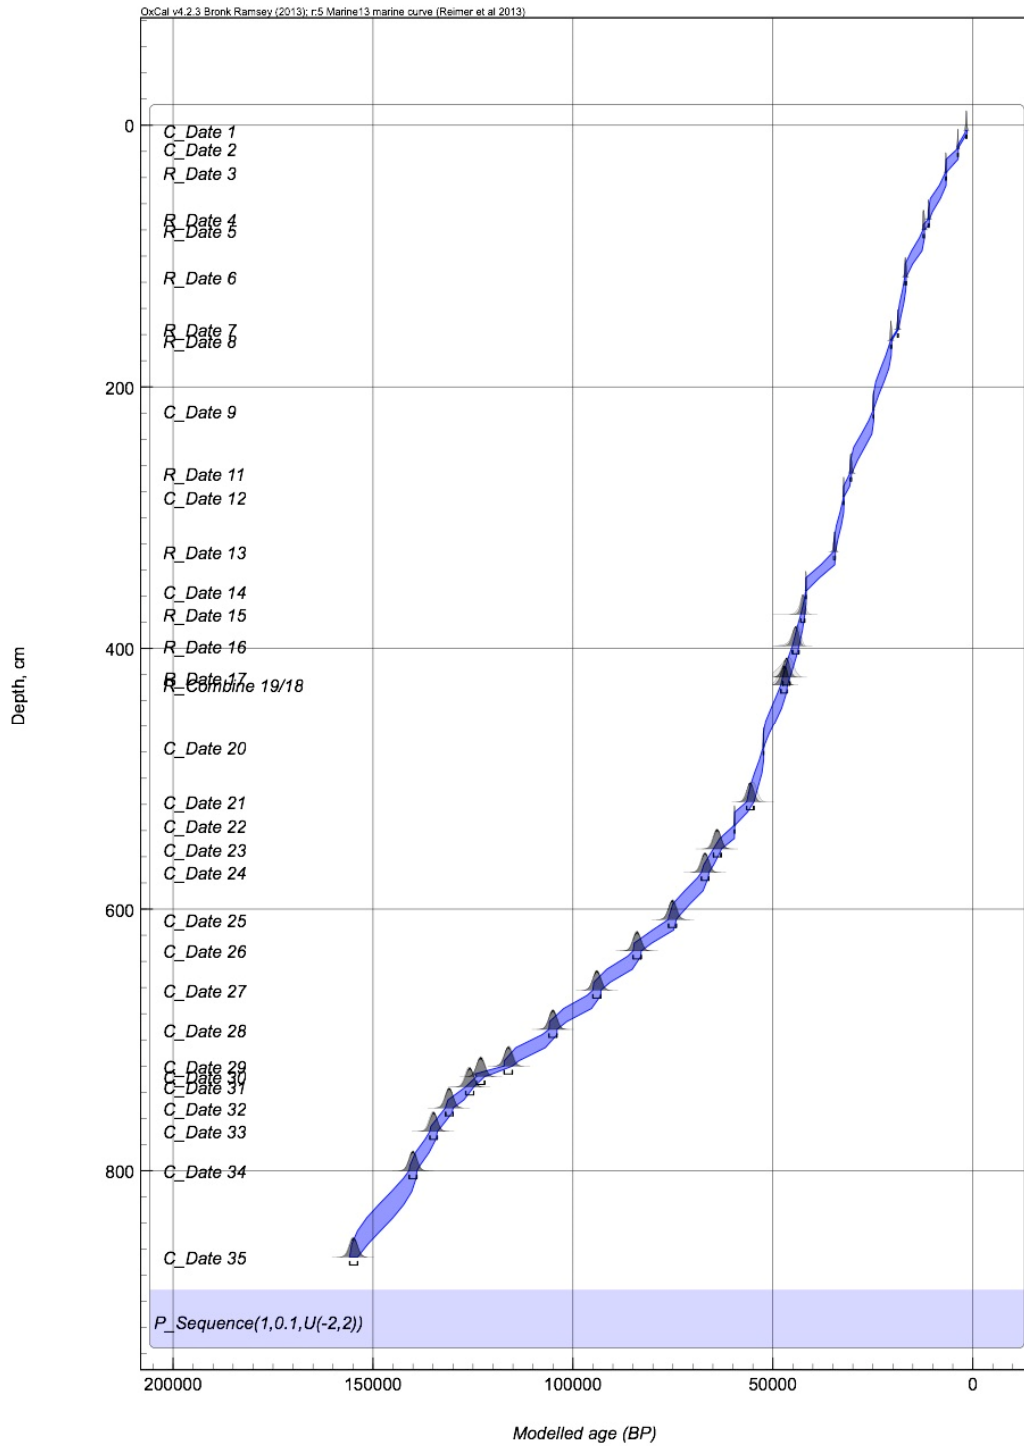

2

3 Supplementary Fig. 1. Modelled age-depth relationship in the Cape Pasley sequence using  
4 OxCal 4.1<sup>51</sup>. Blue envelope denotes the 1σ (68.2%) confidence limits. Light and dark grey  
5 curves denote the prior and posterior probability distributions, respectively.

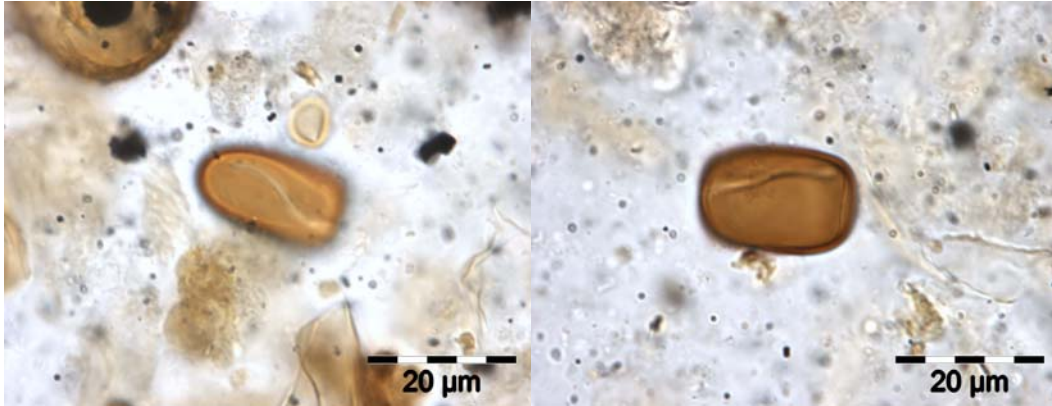

9

10 Supplementary Fig 2. Photographs of *Sporormiella* spores from core MD03-2614G depth  
 11 524 cm (~57 ka BP).

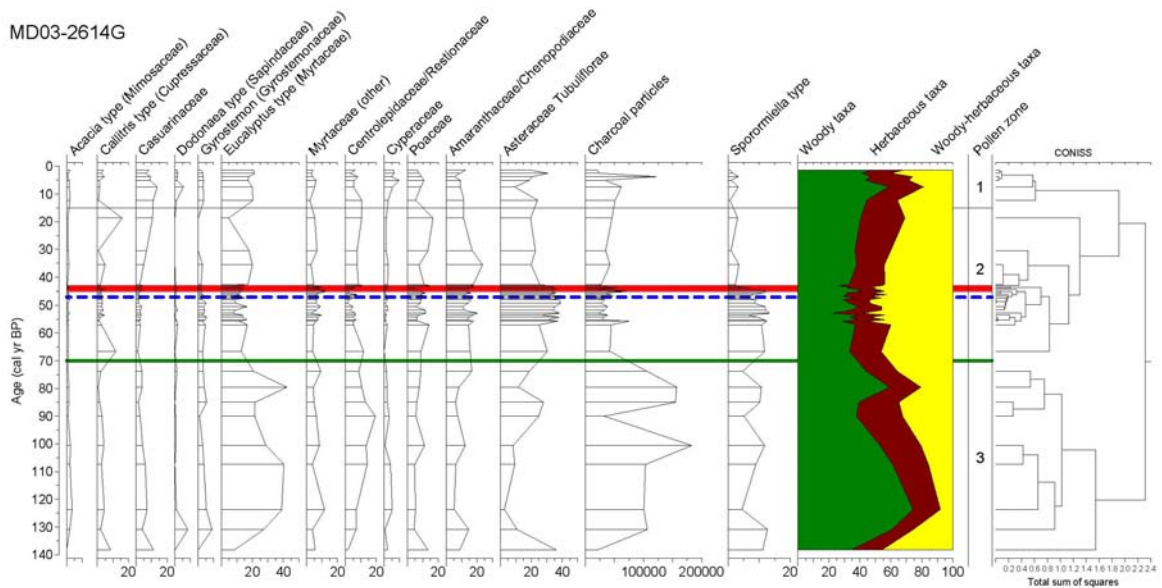

12

13 Supplementary Fig 3. Pollen diagram from core MD03-2614G showing 12 major pollen types  
 14 (percentages of pollen sum), charcoal concentrations, *Sporormiella* spores (percentages of the  
 15 pollen sum) and structural vegetation taxon group ratios. Zonation of the diagram is based on  
 16 stratigraphically constrained cluster analysis (CONISS routine)<sup>54</sup> using the 12 major pollen  
 17 types. The green line indicates major environmental change at ~70 ka, blue line the dispersal  
 18 of humans on Australia ca. 47 ka<sup>16,19</sup> and red shading the regional extinction of megafauna  
 19 between 45 and 43.1 ka in south-western Australia as indicated by the *Sporormiella* curve.

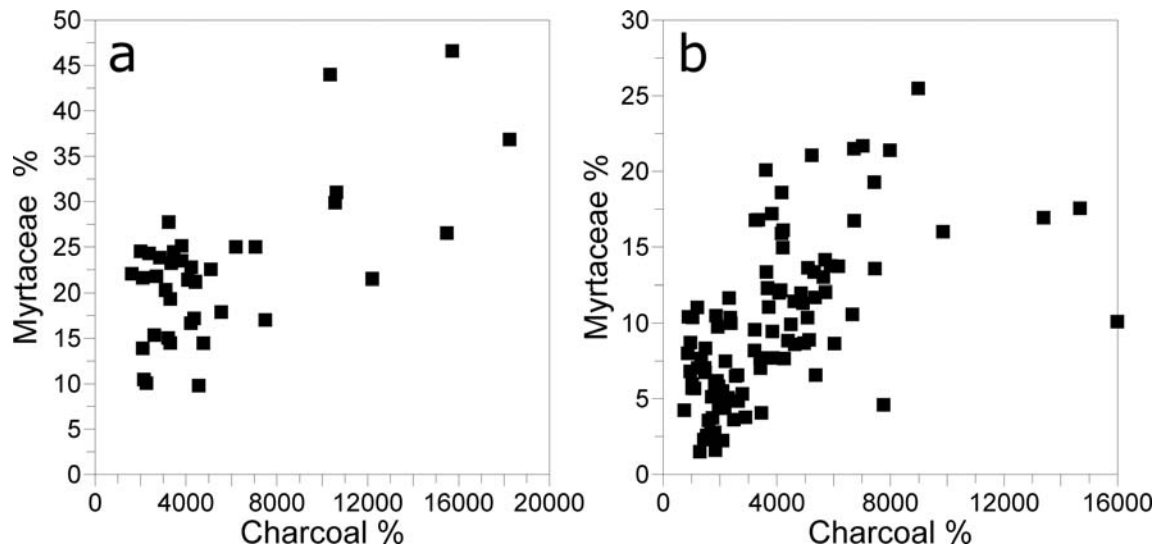

20

21 Supplementary Fig 4. Scatter plot showing percentage of charcoal in relation to percentage of

22 Myrtaceae in core MD03-2614G (a) and Fr10/95-GC17 (b)<sup>30</sup>.

23

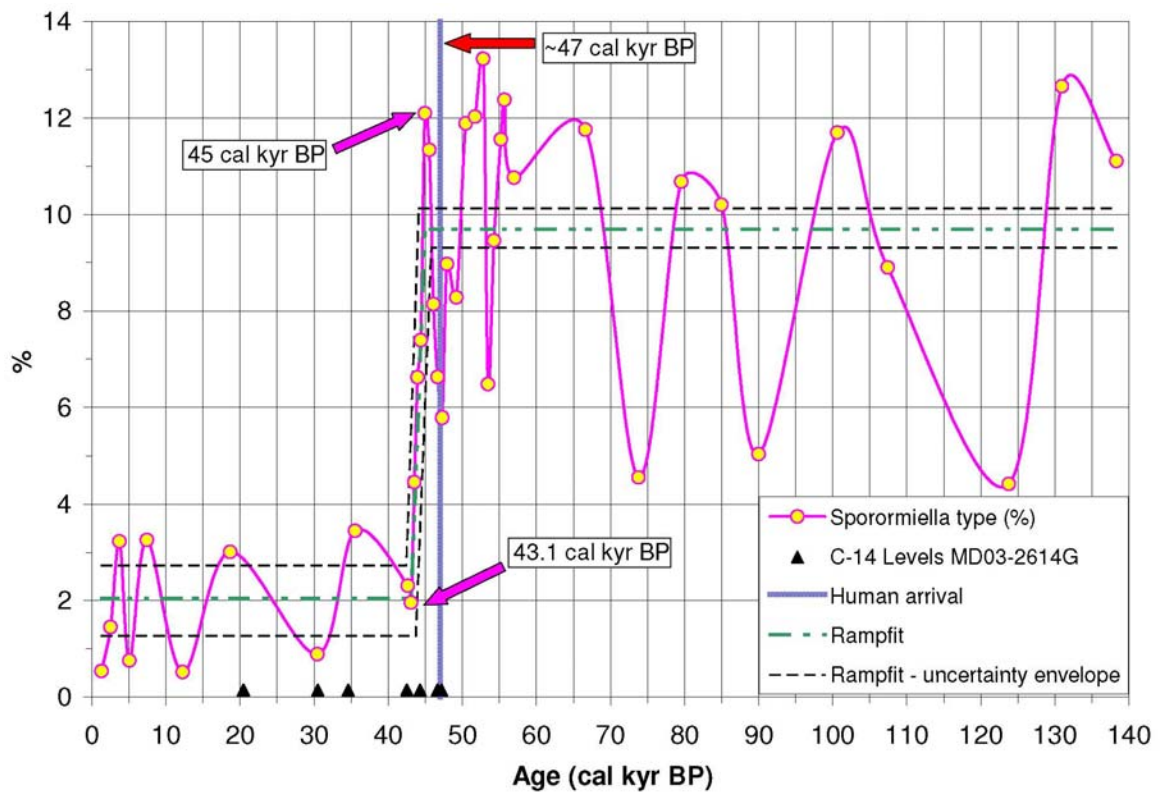

25

26 Supplementary Fig 5. Percentage-age plot for representation of *Sporormiella* spores from core  
 27 MD03-2614G showing the results from the RAMPFIT routine<sup>55</sup> relative to established date of  
 28 human arrival<sup>16,19</sup>.

29

30

31

32

33

34

35

36

37 Supplementary Table 1. AMS <sup>14</sup>C results for core MD03-2614G listing sample levels,  
38 material analysed and laboratory codes.

| level (cm) | Taxon               | mass (mg) | size fraction | <sup>14</sup> C LAB ID | <sup>14</sup> C Age | ± (1-sigma) |
|------------|---------------------|-----------|---------------|------------------------|---------------------|-------------|
| 164.5      | Pteropods           | 1.200     | >250 µm       | KIA 22661              | 17490               | 110         |
| 266        | <i>G. bulloides</i> | 7.580     | >250 µm       | CURL-16658             | 27500               | 170         |
| 266        | <i>G. ruber</i>     | 6.786     | >250 µm       | CURL-16684             | 26650               | 150         |
| 326        | <i>G. bulloides</i> | 7.575     | >250 µm       | CURL-16677             | 31110               | 250         |
| 374        | <i>G. bulloides</i> | 7.264     | >250 µm       | CURL-16076             | 38950               | 960         |
| 398        | <i>G. bulloides</i> | 7.130     | >250 µm       | CURL-16069             | 40920               | 1230        |
| 398        | <i>G. ruber</i>     | 7.004     | >250 µm       | CURL-16070             | 42950               | 1580        |
| 422        | <i>G. bulloides</i> | 6.790     | >250 µm       | CURL-16080             | 43350               | 1650        |
| 422        | <i>G. ruber</i>     | 4.825     | >250 µm       | CURL-16072             | 38570               | 920         |
| 428        | <i>G. bulloides</i> | 11.300    | >250 µm       | CURL-16685             | 44630               | 1320        |
| 428        | <i>G. ruber</i>     | 11.268    | >250 µm       | CURL-16661             | 44460               | 1280        |

39  
40  
41  
42  
43  
44  
45  
46  
47  
48  
49  
50  
51  
52  
53  
54  
55  
56  
57

58 Supplementary Table 2. Radiocarbon dates and tuning tie-points used to establish the  
 59 chronology for core MD03-2614G.

| Depth (cm) | Age (cal. ka) | Event, reference curve                                                                                                                       | Depth therein (m) |
|------------|---------------|----------------------------------------------------------------------------------------------------------------------------------------------|-------------------|
| 4          | 1.61          | Correlation with $^{45}\delta^{18}\text{O}$ <i>G. ruber</i> ODP 1127, GAB                                                                    | 0.3               |
| 18         | 3.73          | Correlation with $^{45}\delta^{18}\text{O}$ <i>G. ruber</i> . <i>ruber</i> ODP 1127, GAB                                                     | 1                 |
| 36         | 6.76          | Correlation with $^{45}\delta^{18}\text{O}$ <i>G. ruber</i> ODP 1127, $^{14}\text{C}$ -dated                                                 | 2                 |
| 72         | 11.08         | Correlation with $^{45}\delta^{18}\text{O}$ <i>G. ruber</i> ODP 1127, $^{14}\text{C}$ -dated                                                 | 7.9               |
| 80         | 12.33         | Correlation with $^{45}\delta^{18}\text{O}$ <i>G. ruber</i> ODP 1127, $^{14}\text{C}$ -dated                                                 | 8.41              |
| 116        | 16.28         | Correlation with $^{45}\delta^{18}\text{O}$ <i>G. ruber</i> ODP 1127, GAB; close to $^{14}\text{C}$ dating at 9.4 m: 16.63 cal. ka           | 9.32              |
| 156        | 18.84         | Correlation with $^{46}\delta^{18}\text{O}$ <i>G. bulloides</i> , MD03-2611; close to $^{14}\text{C}$ dating at 500 cm: 18.62-18.85 cal. ka) | 5                 |
| 164.5      | 20.72         | Radiocarbon dating (pteropods, KIA22661, calibrated Marine13)                                                                                |                   |
| 218        | 24.86         | Correlation with $^{47}\delta\text{D}$ , Vostok ice core                                                                                     | 450               |
| 266        | 31.51         | Radiocarbon dating ( <i>G. bulloides</i> , CURL-16658, calibrated Marine13)                                                                  |                   |
| 266        | 31.13         | Radiocarbon dating ( <i>G. ruber</i> , CURL-16684, calibrated Marine13)                                                                      |                   |
| 284        | 32.30         | Correlation with $^{47}\delta\text{D}$ , Vostok ice core                                                                                     | 538               |
| 326        | 35.67         | Radiocarbon dating ( <i>G. bulloides</i> , CURL-16677, calibrated Marine13)                                                                  |                   |
| 356        | 41.71         | Correlation with $^{47}\delta\text{D}$ , Vostok ice core                                                                                     | 656               |
| 374        | 43.25         | Radiocarbon dating ( <i>G. bulloides</i> , CURL-16076, calibrated Marine13)                                                                  |                   |
| 398        | 44.62         | Radiocarbon dating ( <i>G. bulloides</i> , CURL-16069, calibrated Marine13)                                                                  |                   |
| 398        | 46.42         | Radiocarbon dating ( <i>G. ruber</i> , CURL-16070, calibrated Marine13), discarded                                                           |                   |
| 422        | 46.82         | Radiocarbon dating ( <i>G. bulloides</i> , CURL-16080, calibrated Marine13)                                                                  |                   |
| 422        | 42.92         | Radiocarbon dating ( <i>G. ruber</i> , CURL-16072, calibrated Marine13), discarded                                                           |                   |
| 428        | 47.79         | Radiocarbon dating ( <i>G. bulloides</i> , CURL-16685, calibrated Marine13)                                                                  |                   |
| 428        | 47.62         | Radiocarbon dating ( <i>G. ruber</i> , CURL-16661, calibrated Marine13)                                                                      |                   |
| 476        | 52.35         | Correlation with $^{47}\delta\text{D}$ , Vostok ice core                                                                                     | 787               |
| 518        | 55            | Correlation with $^{48}\delta^{18}\text{O}$ , globally stacked benthic $\delta^{18}\text{O}$                                                 |                   |
| 536        | 59.59         | Correlation with $^{47}\delta\text{D}$ , Vostok ice core                                                                                     | 877               |
| 554        | 64            | Correlation with $^{48}\delta^{18}\text{O}$ , globally stacked benthic $\delta^{18}\text{O}$                                                 |                   |
| 572        | 67            | Correlation with $^{48}\delta^{18}\text{O}$ , globally stacked benthic $\delta^{18}\text{O}$                                                 |                   |
| 608        | 75            | Correlation with $^{48}\delta^{18}\text{O}$ , globally stacked benthic $\delta^{18}\text{O}$                                                 |                   |
| 632        | 84            | Correlation with $^{48}\delta^{18}\text{O}$ , globally stacked benthic $\delta^{18}\text{O}$                                                 |                   |
| 662        | 94            | Correlation with $^{48}\delta^{18}\text{O}$ , globally stacked benthic $\delta^{18}\text{O}$                                                 |                   |
| 692        | 105           | Correlation with $^{48}\delta^{18}\text{O}$ , globally stacked benthic $\delta^{18}\text{O}$                                                 |                   |
| 720        | 116           | Correlation with $^{48}\delta^{18}\text{O}$ , globally stacked benthic $\delta^{18}\text{O}$                                                 |                   |
| 728        | 123           | Correlation with $^{48}\delta^{18}\text{O}$ , globally stacked benthic $\delta^{18}\text{O}$                                                 |                   |
| 736        | 126           | Correlation with $^{48}\delta^{18}\text{O}$ , globally stacked benthic $\delta^{18}\text{O}$                                                 |                   |
| 752        | 131           | Correlation with $^{48}\delta^{18}\text{O}$ , globally stacked benthic $\delta^{18}\text{O}$                                                 |                   |
| 770        | 135           | Correlation with $^{48}\delta^{18}\text{O}$ , globally stacked benthic $\delta^{18}\text{O}$                                                 |                   |
| 800        | 140           | Correlation with $^{48}\delta^{18}\text{O}$ , globally stacked benthic $\delta^{18}\text{O}$                                                 |                   |
| 866        | 155           | Correlation with $^{48}\delta^{18}\text{O}$ , globally stacked benthic $\delta^{18}\text{O}$                                                 |                   |

60

61

62

63

64

65 Supplementary Table 3. RAMPFIT<sup>55</sup> output for MD03-2614G *Sporormiella* data.

| <b>Ramp function regression</b>                          |                    |                      |                    |                   |              |
|----------------------------------------------------------|--------------------|----------------------|--------------------|-------------------|--------------|
| Time interval                                            | 1.318-138.286      | (39 points)          |                    |                   |              |
| xmax                                                     | 13.230             | Xmin                 | 0.520              |                   |              |
| mean (x)                                                 | 7.177              | std (x)              | 4.134              |                   |              |
| time spacing maximum                                     | 16.338             | time spacing minimum | 0.435              |                   |              |
| mean (time spacing)                                      | 3.604              | std (time spacing)   | 3.932              |                   |              |
| Prescribe standard deviation                             | <48 ka: 3.500      | >48 ka: 2.800        |                    |                   |              |
| t-search - t1                                            | 1.318-138.286      | t-search - t2        | 1.318-138.286      |                   |              |
| Fit results                                              | t1 = <b>43.087</b> | x1 = <b>2.041</b>    | t2 = <b>44.966</b> | x2 = <b>9.694</b> |              |
| <b>Nonparametric bootstrapping (B = 2000, p = 0.500)</b> |                    |                      |                    |                   |              |
|                                                          | fit                | ave                  | std                | med               | 1.48 mad     |
| t1                                                       | 43.087             | 42.951               | 2.215              | 43.087            | <b>0.645</b> |
| x1                                                       | 2.041              | 1.969                | 0.746              | 1.996             | <b>0.729</b> |
| t2                                                       | 44.966             | 45.058               | 1.268              | 44.966            | <b>0.851</b> |
| x2                                                       | 9.694              | 9.715                | 0.419              | 9.716             | <b>0.412</b> |

66

67

68

69

70

71

72

73

74

75

76

77

78

79

80 Supplementary Table 4. Percentage values of *Sporormiella* spores and depth and age of each  
 81 sample analysed from core MD03-2614G, as well as the results from the RAMPFIT routine<sup>55</sup>.

| Depth (cm) | Age (ka BP) | <i>Sporormiella</i> (%) | RAMPFIT output |
|------------|-------------|-------------------------|----------------|
| 2          | 1.317571    | 0.54                    | 2.040609       |
| 10         | 2.523286    | 1.45                    | 2.040609       |
| 18         | 3.729       | 3.23                    | 2.040609       |
| 26         | 5.061444    | 0.76                    | 2.040609       |
| 42         | 7.439833    | 3.26                    | 2.040609       |
| 80         | 12.265      | 0.52                    | 2.040609       |
| 155        | 18.69292    | 3.01                    | 2.040609       |
| 266        | 30.441      | 0.89                    | 2.040609       |
| 330        | 35.5492     | 3.45                    | 2.040609       |
| 374        | 42.652      | 2.31                    | 2.040609       |
| 380        | 43.087      | 1.96                    | 2.040609       |
| 386        | 43.522      | 4.46                    | 3.812241       |
| 392        | 43.957      | 6.62                    | 5.583888       |
| 398        | 44.392      | 7.39                    | 7.355519       |
| 404        | 44.96625    | 12.1                    | 9.694302       |
| 410        | 45.5405     | 11.34                   | 9.694302       |
| 416        | 46.11475    | 8.14                    | 9.694302       |
| 422        | 46.689      | 6.63                    | 9.694302       |
| 428        | 47.297      | 5.79                    | 9.694302       |
| 434        | 47.92862    | 8.97                    | 9.694302       |
| 446        | 49.19188    | 8.28                    | 9.694302       |
| 458        | 50.45512    | 11.89                   | 9.694302       |
| 470        | 51.71838    | 12.03                   | 9.694302       |
| 482        | 52.82757    | 13.23                   | 9.694302       |
| 490        | 53.46433    | 6.48                    | 9.694302       |
| 500        | 54.26028    | 9.46                    | 9.694302       |
| 512        | 55.21543    | 11.56                   | 9.694302       |
| 518        | 55.693      | 12.38                   | 9.694302       |
| 524        | 56.993      | 10.76                   | 9.694302       |
| 570        | 66.63133    | 11.76                   | 9.694302       |
| 602        | 73.7805     | 4.56                    | 9.694302       |
| 620        | 79.553      | 10.68                   | 9.694302       |
| 635        | 84.969      | 10.2                    | 9.694302       |
| 650        | 89.994      | 5.04                    | 9.694302       |
| 680        | 100.6158    | 11.7                    | 9.694302       |
| 698        | 107.4104    | 8.9                     | 9.694302       |
| 730        | 123.7483    | 4.42                    | 9.694302       |
| 752        | 130.916     | 12.66                   | 9.694302       |
| 790        | 138.2857    | 11.11                   | 9.694302       |

82  
 83
